# Supplementary material for: Prehemodialysis arteriovenous access creation is associated with better cardiovascular outcomes in patients receiving hemodialysis: a population-based cohort study
Source: PeerJ journal article supplement (doi:10.7717/peerj.6680), 2019-04-03

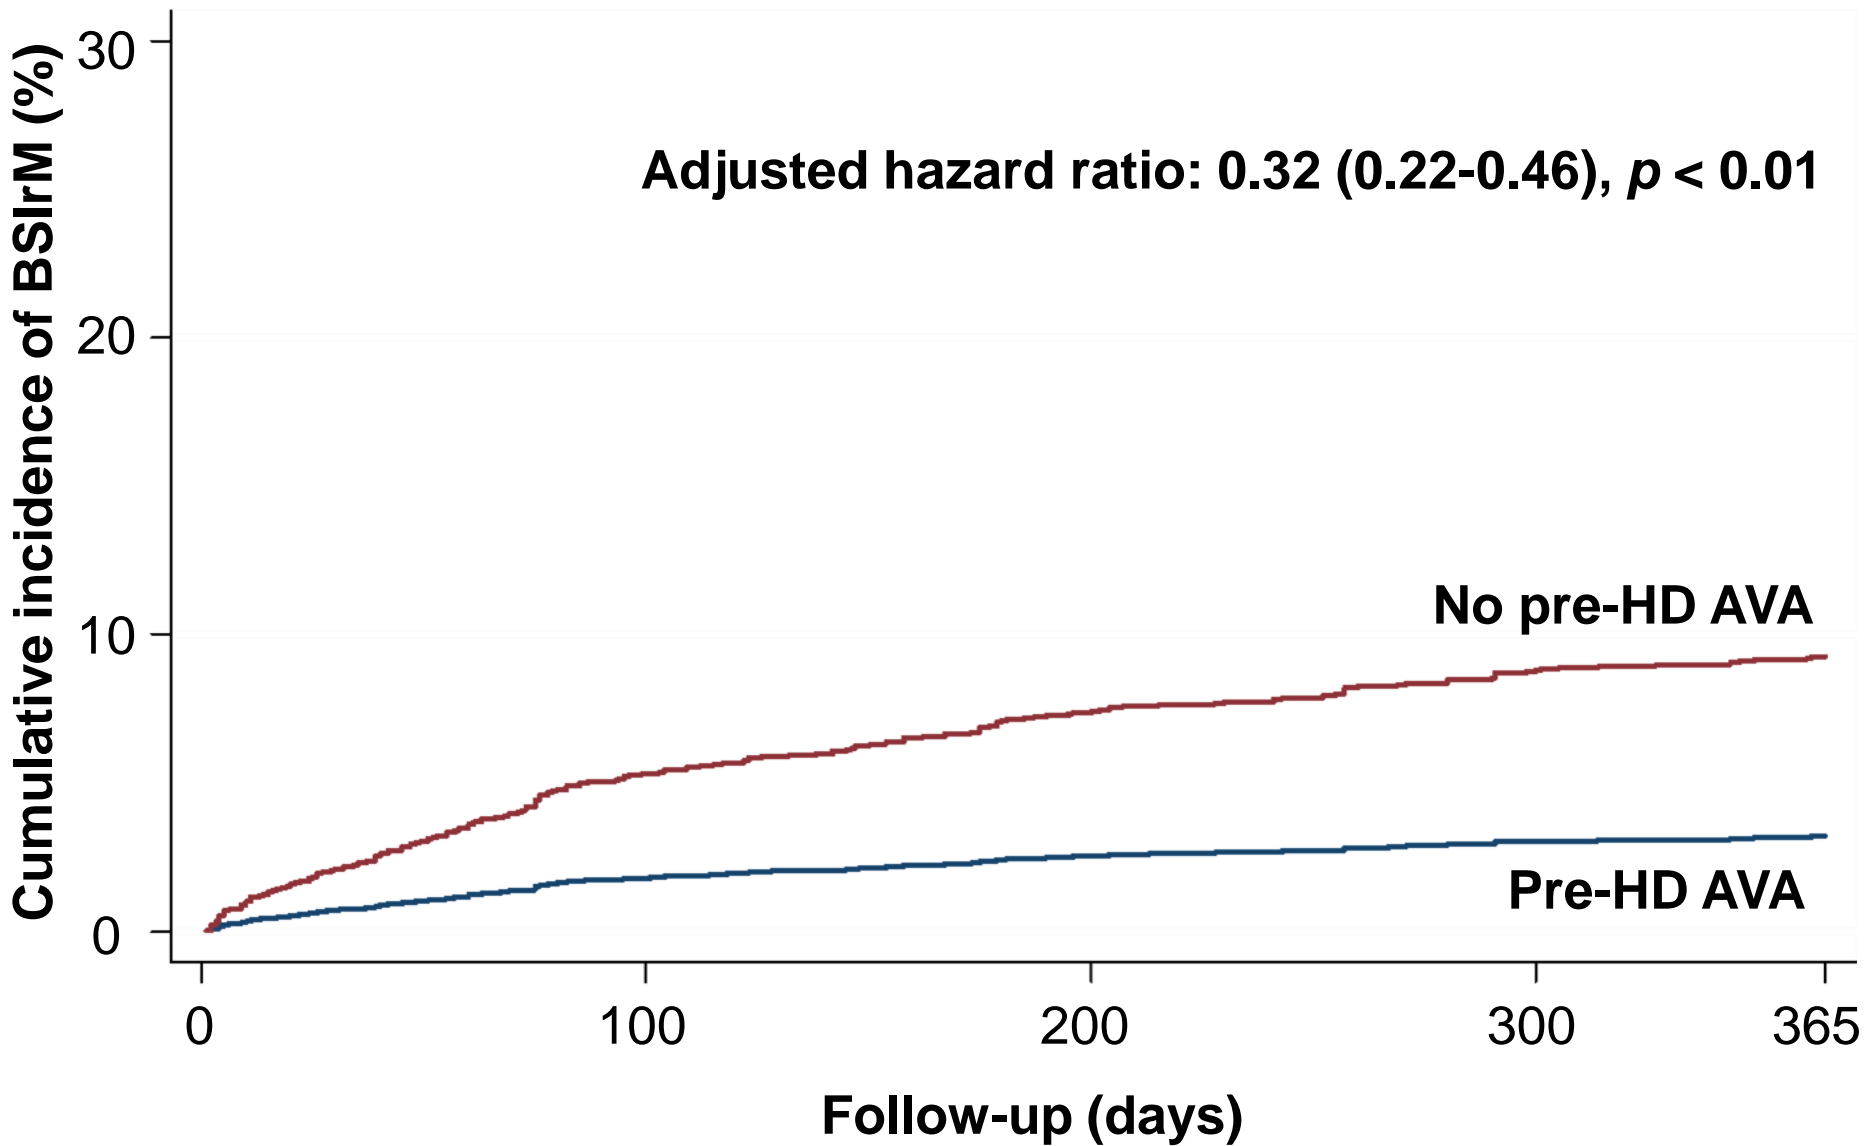

Supplement: Supplementary_Figure_1_S1_Revision1.pdf [file Supplementary_Figure_1_S1_Revision1.pdf]
